# Supplementary material for: Methodological Quality and Risk of Bias of Systematic Reviews and Meta-Analyses on Stem Cells for Knee Osteoarthritis: A Cross-Sectional Survey
Source: Research Square preprint supplement (doi:10.21203/rs.3.rs-1143632/v1), 2021-12-14
Supplement: Supplementary file 1 [file b0899d29bc24fdeca11b2c0c.docx]

Supplementary Table 2. Retrieval source data analysis

| Study |  | | Search database | | | | | | | | | | | | | | |
| --- | --- | --- | --- | --- | --- | --- | --- | --- | --- | --- | --- | --- | --- | --- | --- | --- | --- |
|  | PubMed | Embase | | Cochrane Library | Web of Science | CINAHL | PEDro | SPORTD  iscus | Scopus | Science Direct | Springer-Link | AMED | Google Scholar | BIOSIS Previews | Grey Literature Databases | Trial Registry Platform | Chinese Databases |
| Xia et al. | **＋** | **＋** | | **＋** | **－** | **－** | **－** | **－** | **－** | **－** | **－** | **－** | **－** | **＋** | — | **＋** | **＋** |
| Cui et al. | **＋** | **＋** | | **＋** | **＋** | **－** | **－** | **－** | **－** | **－** | **－** | **－** | **－** | **－** | **－** | **＋** | **－** |
| Yubo et al. | **＋** | **－** | | **－** | **－** | **－** | **－** | **－** | **－** | **＋** | **＋** | **－** | **－** | **－** | **－** | **＋** | **＋** |
| Pas et al. | **＋** | **＋** | | **＋** | **＋** | **＋** | **＋** | **＋** | **－** | **－** | **－** | **－** | **－** | **－** | **＋** | **＋** | **－** |
| Iijima et al. | **＋** | **－** | | **＋** | **－** | **＋** | **＋** | **－** | **－** | **－** | **－** | **－** | **－** | **－** | **－** | **－** | **－** |
| Davidson et al. | **＋** | **－** | | **－** | **－** | **－** | **－** | **－** | **－** | **－** | **－** | **－** | **＋** | **－** | **－** | **－** | **－** |
| Shin et al. | **＋** | **＋** | | **＋** | **－** | **－** | **－** | **－** | **－** | **－** | **－** | **－** | **－** | **－** | **－** | **－** | **－** |
| Ha et al. | **＋** | **＋** | | **＋** | **＋** | **＋** | **－** | **－** | **＋** | **－** | **－** | **－** | **－** | **－** | **－** | **－** | **－** |
| Kim et al. | **＋** | **＋** | | **＋** | **－** | **＋** | **－** | **－** | **＋** | **－** | **－** | **－** | **－** | **－** | **－** | **－** | **－** |
| Migliorini et al. | **＋** | **＋** | | **＋** | **－** | **－** | **－** | **－** | **＋** | **－** | **－** | **＋** | **＋** | **－** | **－** | **－** | **－** |
| Wang et al. | **＋** | **＋** | | **＋** | **－** | **－** | **－** | **－** | **－** | **－** | **－** | **－** | **－** | **－** | **－** | **－** | **＋** |
| Dai et al. | **＋** | **＋** | | **＋** | **－** | **－** | **－** | **－** | **＋** | **－** | **－** | **－** | **－** | **－** | **－** | **－** | **－** |
| Hall et al. | **＋** | **－** | | **－** | **－** | **－** | **－** | **－** | **－** | **＋** | **－** | **－** | **－** | **－** | **－** | **－** | **－** |
| Han et al. | **＋** | **＋** | | **＋** | **＋** | **－** | **－** | **－** | **－** | **－** | **－** | **－** | **－** | **－** | **－** | **＋** | **－** |
| Huang et al. | **＋** | **＋** | | **＋** | **－** | **－** | **－** | **－** | **－** | **－** | **－** | **－** | **－** | **－** | **－** | **－** | **－** |
| Jeyaraman et al. | **＋** | **＋** | | **＋** | **－** | **－** | **－** | **－** | **－** | **－** | **－** | **－** | **－** | **－** | **－** | **－** | **－** |
| Kim et al. | **＋** | **＋** | | **＋** | **－** | **＋** | **－** | **－** | **＋** | **－** | **－** | **－** | **－** | **－** | **－** | **－** | **－** |
| Ma et al. | **＋** | **＋** | | **＋** | **－** | **－** | **－** | **－** | **－** | **－** | **－** | **－** | **－** | **－** | **－** | **－** | **－** |
| Wang et al. | **＋** | **＋** | | **＋** | **－** | **－** | **－** | **－** | **－** |  | **－** | **－** | **－** | **－** | **－** | **－** | **－** |
| Song et al. | **＋** | **＋** | | **＋** | **＋** | **－** | **－** | **－** | **－** |  | **－** | **－** | **－** | **－** | **－** | **＋** | **－** |
| Qu et al. | **＋** | **＋** | | **－** | **＋** | **－** | **－** | **－** | **－** |  | **－** | **－** | **－** | **－** | **－** | **－** | **＋** |
| Tan et al. | **＋** | **－** | | **＋** | **－** | **＋** | **－** | **－** | **－** |  | **－** | **－** | **－** | **－** | **－** | **－** | **－** |

Supplementary Table 3. The overall of retrieval source data analysis

| English Databases  (N = 22) | n (%) | Grey Literature Databases  (N = 22) | n (%) | Trial Registry Platform  (N = 22) | n (%) | Chinese Databases  (N = 22) | n (%) |
| --- | --- | --- | --- | --- | --- | --- | --- |
| PubMed | 22 (100.00%) | BIOSIS Previews | 1 (4.55%) | Clinical Trials.gov | 6 (27.27%) | CBM | 2 (9.09%) |
| Cochrane Library | 18 (81.82%) | Open Grey | 1 (4.55%) | WHO International Clinical T rials Registry Platform | 1 (4.55%) | CNKI | 2 (9.09%) |
| Embase | 17 (77.27%) | British Library Inside | 1 (4.55%) | European Clinical Trial Register | 1 (4.55%) | the Wangfang Database | 2 (9.09%) |
| Web of Science | 6 (27.27%) |  |  | International Standard Randomized Controlled Trial Number registry | 1 (4.55%) | the China Science and Technology Journal Database | 1 (4.55%) |
| CINAHL | 6 (27.27%) |  |  |  |  | China Journal Net | 1 (4.55%) |
| PEDro | 2 (9.09%) |  |  |  |  |  |  |
| SPORTDiscus | 1 (4.55%) |  |  |  |  |  |  |
| Scopus | 5 (22.73%) |  |  |  |  |  |  |
| Science Direct | 2 (9.09%) |  |  |  |  |  |  |
| Springer-Link | 1 (4.55%) |  |  |  |  |  |  |
| AMED | 1 (4.55%) |  |  |  |  |  |  |
| Google Scholar | 2 (9.09%) |  |  |  |  |  |  |
| BIOSIS Previews | 1 (4.55%) |  |  |  |  |  |  |
